# Supplementary material
Source: MDPI journal article supplement (https://www.mdpi.com/2227-9717/5/4/72)
Supplement: s1 [file s1]

# Supplementary Materials: Development of Molecularly Imprinted Polymers to Target Polyphenols Present in Plant Extracts

Catarina Gomes, Gayane Sadoyan, Rolando C. S. Dias and Mário Rui P. F. N. Costa

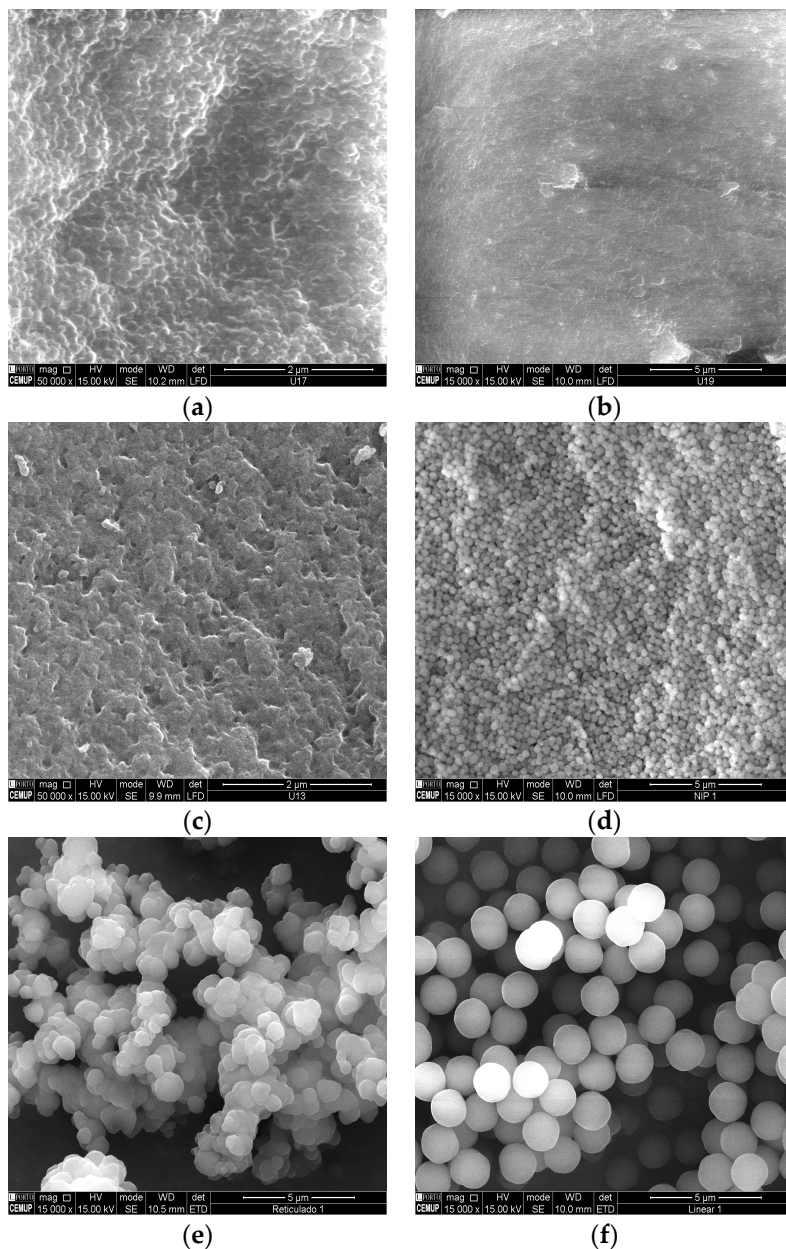

**Figure S1.** Supplementary SEM images for different kinds of products synthesized in this research: (a) MIP2 (prec. 4VP/ACN/MeOH); (b) MIP4 (prec. 4VP/TOL/MeOH); (c) MIP9 prec. DMAEMA/ACN/MeOH; (d) NIP1 obtained in equivalent reaction conditions of MIP1 (prec. MAA/ACN/MeOH); (e) EGDMA particles obtained in equivalent reaction conditions of MIP1 (prec. ACN/MeOH); (f) MAA particles obtained in equivalent reaction conditions of MIP1 (prec. ACN/MeOH).

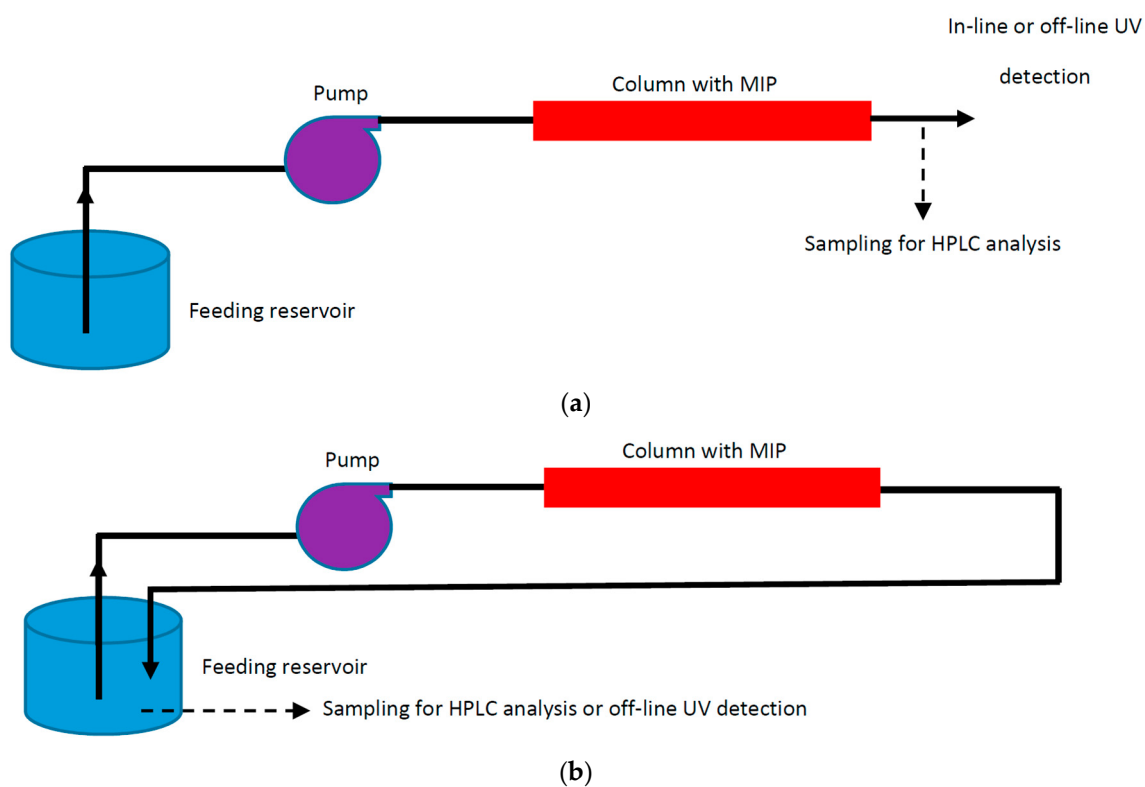

**Figure S2.** Different continuous processes considered in this work for the sorption of polyphenols and natural extracts in the prepared MIPs. **(a)** Continuous sorption process without recycling (e.g., for frontal analysis measurements). **(b)** Continuous sorption process with recycling (e.g., for a simple description of equilibrium conditions).
